# Supplementary material for: Phosphorylation of HSF1 at serine 326 residue is related to the maintenance of gynecologic cancer stem cells through expression of HSP27
Source: PubMed Central journal article supplement (PMC5458228; doi:10.18632/oncotarget.16361), 2017-03-18
Supplement: oncotarget-08-31540-s001.pdf [file oncotarget-08-31540-s001.pdf]

## Phosphorylation of HSF1 at serine 326 residue is related to the maintenance of gynecologic cancer stem cells through expression of HSP27

### Supplementary Materials

**Supplementary Table 1: Primer sequences for RT-PCR**

| Gene Name |         | Primer sequence (5'→3')   | Product size (bp) |
|-----------|---------|---------------------------|-------------------|
| ALDH1A1   | forward | TGTTAGCTGATGCCGACTTG      | 154               |
|           | reverse | TTCTTAGCCCGCTCAACACT      |                   |
| SOX2      | forward | GCCTGGGCGCCGAGTGG A       | 301               |
|           | reverse | GGGCGAGCCGTT CATGTAGGTCTG |                   |
| POU5F1    | forward | TGGAGAAGGAGAAGCTGGAGCAAAA | 186               |
|           | reverse | GGCAGATGGTCGTTTGGCTGAATA  |                   |
| NANOG     | forward | ATCCAGCTTG TCCCCAAAG      | 459               |
|           | reverse | ATTCATTCGCTGGTTCTGG       |                   |
| CD44      | forward | AGGCTGGGAGCCAAATGAAG      | 83                |
|           | reverse | TGTGGTCAA AAGCCCGTGG      |                   |
| ABCG2     | forward | CACCTTATTGGCCTCAGGAA      | 206               |
|           | reverse | CCTGCTTGGAAGGCTCTATG      |                   |
| HSP27     | forward | GGAGTGGTCGCAGTGGTTAG      | 764               |
|           | reverse | GGACAGGGAGGAAACTT         |                   |
| GAPDH     | forward | ACCACAGTCCATGCCATCAC      | 452               |
|           | reverse | TCCACCACCCTGTTGCTGTA      |                   |

**Supplementary Table 2: List of genes upregulated in HEC-1 ALDH1high cells**

| Gene symbol | Gene name                                          | Accession no. | Expression ratio |         |
|-------------|----------------------------------------------------|---------------|------------------|---------|
|             |                                                    |               | Cy3/Cy5          | Cy5/Cy3 |
| TBX3        | T-box 3(ulner mammary syndrome)                    | NM_016569     | 34.553           | 2.5109  |
| HSD17B4     | Hydroxysteroid (17-beta) dehydrogenase 4           | NM_000414     | 26.865           | 2.197   |
| MAPK13      | Mitogen-activated protein kinase 13                | NM_002754     | 22.685           | 2.155   |
| UBQLN2      | Ubiquilin 2                                        | NM_0013444    | 10.524           | 2.022   |
| TAIP-2      | TGF-beta induced apoptosis protein 2               | NM_024969     | 10.212           | 2.879   |
| BCL7B       | B-cell CLL/lymphoma 7B                             | NM_001707     | 7.732            | 2.081   |
| IL1B        | Interleukin1, beta                                 | NM_000576     | 7.183            | 2.87    |
| SEPW1       | SelenoproteinW 1                                   | NM_003009     | 4.453            | 2.159   |
| HSPB1       | Heat shock 27kDa protein 1                         | NM_001540     | 3.547            | 2.718   |
| PTTG1IP     | Pituitary tumor-transforming1, interacting protein | NM_004339     | 2.599            | 2.302   |
| CAPN1       | Calpain 1, large subunit                           | NM_005186     | 2.487            | 2.073   |
| MPL         | Myeloproliferative leukemia virus oncogene         | NM_005373     | 2.296            | 2.175   |

Genes showing the ratio more than 2.0, which were reproducible in two experiment, were listed.

**Supplementary Table 3: Summary of patients clinicopathological status**

| Characteristic                |              | pHSF expression |               |               | P       | Total<br>(N = 122) |           |           |
|-------------------------------|--------------|-----------------|---------------|---------------|---------|--------------------|-----------|-----------|
|                               |              | 0<br>(N = 41)   | 1<br>(N = 40) | 2<br>(N = 41) |         |                    |           |           |
| Age                           | Mean ± SD    | 11              | 10            | 11            | 0.91    | 55.1 ± 10.2        |           |           |
|                               | Range        | 55              | 55            | 55            |         |                    | 29–81     |           |
| Parity (%)                    | 0            | 10              | 14            | 15            | 0.72    | 39 (32)            |           |           |
|                               | 1            | 12              | 7             | 7             |         |                    | 26 (21.3) |           |
|                               | 2            | 14              | 14            | 12            |         |                    | 40 (32.8) |           |
|                               | 3            | 4               | 4             | 7             |         |                    | 15 (12.3) |           |
|                               | 4            | 1               | 1             | 0             |         |                    | 2 (1.64)  |           |
| Histological subtype (%)      | Serous       | 16              | 20            | 25            | 0.14    | 61 (50)            |           |           |
|                               | Clearcell    | 15              | 12            | 10            |         |                    | 0.49      | 37 (30.3) |
|                               | Endometrioid | 6               | 7             | 5             |         |                    | 0.80      | 18 (14.8) |
|                               | Mucinous     | 4               | 1             | 1             |         |                    | 0.21      | 6 (4.92)  |
| FIGO Stage No. (%)            | I            | 22              | 11            | 9             | 0.001** | 42 (34.4)          |           |           |
|                               | II           | 5               | 0             | 1             |         |                    | 6 (4.92)  |           |
|                               | III          | 13              | 27            | 26            |         |                    | 66 (54.1) |           |
|                               | IV           | 1               | 2             | 5             |         |                    | 8 (6.56)  |           |
| Peritoneal dissemination (%)  |              | 15              | 27            | 29            | 0.003** | 71 (58.2)          |           |           |
| Lymph node metastasis (%)     |              | 9               | 9             | 18            | 0.04*   | 36 (30)            |           |           |
| Optimal debulking surgery (%) |              | 32              | 21            | 18            | 0.008** | 72 (59)            |           |           |
| Platinum resistant (%)        |              | 7               | 23            | 20            | < 0.001 | 50 (41)            |           |           |
